# Supplementary material for: Relationship between protein biomarkers of chemotherapy response and microsatellite status, tumor mutational burden and PD‐L1 expression in cancer patients
Source: PubMed Central journal article supplement (PMC7051881; doi:10.1002/ijc.32661), 2019-10-01
Supplement: NIHMS1050365-supplement-Supplemental.pdf [file NIHMS1050365-supplement-Supplemental.pdf]

**Supplemental Table 1:** Relationship between protein expression and potential chemotherapy benefit

|              | <b>Protein Expression</b> | <b>Chemotherapy of Potential Benefit</b> |
|--------------|---------------------------|------------------------------------------|
| <b>ERCC1</b> | Negative                  | Platinum                                 |
| <b>MGMT</b>  | Negative                  | Dacarbazine, Temozolomide                |
| <b>RRM1</b>  | Negative                  | Gemcitabine                              |
| <b>TOP2A</b> | Positive                  | Doxorubicin, Epirubicin, Etoposide       |
| <b>TOPO1</b> | Positive                  | Irinotecan, Topotecan                    |
| <b>TS</b>    | Negative                  | Fluorouracil, Pemetrexed                 |
| <b>TUBB3</b> | Negative                  | Taxanes*                                 |

\*TUBB3 positivity predicts taxane resistance

Abbreviations: ERCC1=excision repair complementation group 1, MGMT= O-6-methyl guanine DNA methyltransferase, RRM1=ribonucleotide reductase regulatory subunit M1, TOP2A=topoisomerase 2, TOPO1=topoisomerase 1, TS=thymidylate synthetase, TUBB3=tubulin beta 3

**Supplemental Table 2: Methodology for determining various markers shown in Table 1\***

|              | <b>Method</b> | <b>Comment</b>                                                                                                                            |
|--------------|---------------|-------------------------------------------------------------------------------------------------------------------------------------------|
| <b>MSI-H</b> | NGS           | Direct analysis of short tandem repeat tracts in the target regions of sequenced genes; High: $\geq 46$ altered microsatellite loci**     |
| <b>TMB-H</b> | NGS           | Calculated using nonsynonymous missense mutations; common germline variants excluded; High TMB: $\geq 17$ mutations/Mb**                  |
| <b>PD-L1</b> | IHC           | Antibody: SP142 (Ventana); Tumor tissue staining with $\geq 5\%$ considered positive**                                                    |
| <b>ERCC1</b> | IHC           | Antibody: 8F1 (Abcam); Positive: staining intensity of 2+ in at least 50% or 3+ in at least 10% or more tumor cells on a given slide      |
| <b>MGMT</b>  | IHC           | Antibody: MT21.2 (Invitrogen); Positive: staining intensity of $\geq 2+$ in at least 50% or more tumor cells on a given slide             |
| <b>RRM1</b>  | IHC           | Antibody: polyclonal (Proteintech Group); Positive: staining intensity of 2+ or 3+ in at least 35% or more tumor cells on a given slide   |
| <b>TOP2A</b> | IHC           | Antibody: 3F6 (Leica Microsystems); Positive: staining intensity of $\geq 1+$ in at least 10% or more tumor cells on a given slide        |
| <b>TOPO1</b> | IHC           | Antibody: 1D6 (Leica Microsystems); Positive: staining intensity of 2+ or 3+ in at least 30% or more tumor cells on a given tumor section |
| <b>TS</b>    | IHC           | Antibody: TS106 (Dako); Positive: staining intensity of $\geq 1+$ in at least 10% or more tumor cells on a given slide                    |
| <b>TUBB3</b> | IHC           | Antibody: PRB-435P (BioLegend); Positive: staining intensity of 2+ or 3+ in at least 30% or more tumor cells on a given tumor section     |

\*See also **Methods**

\*\*Gatalica Z, Xiu J, Swensen J, et al: Comprehensive analysis of cancers of unknown primary for the biomarkers of response to immune checkpoint blockade therapy. Eur J Cancer 94:179-186, 2018

**Abbreviations:** ERCC1=excision repair complementation group 1, MGMT= O-6-methyl guanine DNA methyltransferase, MSI =microsatellite instability, NGS = next generation sequencing; RRM1=ribonucleotide reductase regulatory subunit M1, TMB = tumor mutational burden; TOP2A=topoisomerase 2, TOPO1=topoisomerase 1, TS=thymidylate synthetase, TUBB3=tubulin beta 3

**Supplemental Table 3: MSI, TMB, PD-L1 by Cancer Type (bolded percentages are indicative of response to cognate therapy)\***

| Type of Cancer                  | MSI-H** |              |          | TMB-H** |              |          | PD-L1** |              |          |
|---------------------------------|---------|--------------|----------|---------|--------------|----------|---------|--------------|----------|
|                                 | N       | Positive     | Negative | N       | Positive     | Negative | N       | Positive     | Negative |
| All                             | 28034   | <b>3.3%</b>  | 96.7%    | 27847   | <b>8.4%</b>  | 91.6%    | 22114   | <b>11.0%</b> | 89.0%    |
| Adrenal                         | 40      | <b>0.0%</b>  | 100.0%   | 40      | <b>2.5%</b>  | 97.5%    | 39      | <b>12.8%</b> | 87.2%    |
| Anal                            | 101     | <b>0.0%</b>  | 100.0%   | 100     | <b>6.0%</b>  | 94.0%    | 99      | <b>40.4%</b> | 59.6%    |
| Bladder                         | 298     | <b>0.7%</b>  | 99.3%    | 297     | <b>17.8%</b> | 82.2%    | 294     | <b>25.2%</b> | 74.8%    |
| Bone                            | 77      | <b>1.3%</b>  | 98.7%    | 77      | <b>1.3%</b>  | 98.7%    | 74      | <b>0.0%</b>  | 100.0%   |
| Breast                          | 2427    | <b>0.7%</b>  | 99.3%    | 2397    | <b>3.6%</b>  | 96.4%    | 2293    | <b>5.8%</b>  | 94.2%    |
| CNS tumors                      | 171     | <b>0.0%</b>  | 100.0%   | 171     | <b>1.2%</b>  | 98.8%    | 171     | <b>8.8%</b>  | 91.2%    |
| Colorectal cancer               | 3848    | <b>6.3%</b>  | 93.7%    | 3831    | <b>7.3%</b>  | 92.7%    | 3615    | <b>3.5%</b>  | 96.5%    |
| Cholangiocarcinoma              | 434     | <b>1.8%</b>  | 98.2%    | 426     | <b>3.5%</b>  | 96.5%    | 400     | <b>9.0%</b>  | 91.0%    |
| Epithelial Ovarian              | 3855    | <b>1.3%</b>  | 98.7%    | 3818    | <b>1.7%</b>  | 98.3%    | 3674    | <b>6.7%</b>  | 93.3%    |
| Esophageal                      | 532     | <b>1.3%</b>  | 98.7%    | 527     | <b>2.5%</b>  | 97.5%    | 497     | <b>12.5%</b> | 87.5%    |
| Extrahepatic cholangiocarcinoma | 68      | <b>1.5%</b>  | 98.5%    | 67      | <b>1.5%</b>  | 98.5%    | 65      | <b>3.1%</b>  | 96.9%    |
| Female genital tract malignancy | 2874    | <b>14.3%</b> | 85.7%    | 2854    | <b>11.6%</b> | 88.4%    | 2777    | <b>10.2%</b> | 89.8%    |
| GBM                             | 948     | <b>0.6%</b>  | 99.4%    | 943     | <b>3.0%</b>  | 97.0%    | 910     | <b>15.2%</b> | 84.8%    |
| GIST                            | 154     | <b>0.0%</b>  | 100.0%   | 154     | <b>0.0%</b>  | 100.0%   | 179     | <b>19.0%</b> | 81.0%    |
| Gastric                         | 495     | <b>7.7%</b>  | 92.3%    | 492     | <b>7.5%</b>  | 92.5%    | 459     | <b>10.2%</b> | 89.8%    |
| HCC                             | 179     | <b>1.7%</b>  | 98.3%    | 177     | <b>2.8%</b>  | 97.2%    | 174     | <b>7.5%</b>  | 92.5%    |
| Head and Neck                   | 526     | <b>0.6%</b>  | 99.4%    | 523     | <b>6.5%</b>  | 93.5%    | 494     | <b>36.6%</b> | 63.4%    |
| Kidney                          | 353     | <b>0.6%</b>  | 99.4%    | 349     | <b>8.6%</b>  | 91.4%    | 343     | <b>19.8%</b> | 80.2%    |
| Low Grade Glioma                | 193     | <b>0.5%</b>  | 99.5%    | 193     | <b>1.0%</b>  | 99.0%    | 176     | <b>2.8%</b>  | 97.2%    |
| Merkel cell                     | 12      | <b>0.0%</b>  | 100.0%   | 12      | <b>41.7%</b> | 58.3%    | 12      | <b>0.0%</b>  | 100.0%   |

|                             |      |              |        |      |              |        |      |              |       |
|-----------------------------|------|--------------|--------|------|--------------|--------|------|--------------|-------|
| MFST                        | 9    | <b>0.0%</b>  | 100.0% | 9    | <b>0.0%</b>  | 100.0% | 8    | <b>12.5%</b> | 87.5% |
| Male Genital Tract          | 56   | <b>0.0%</b>  | 100.0% | 56   | <b>5.4%</b>  | 94.6%  | 55   | <b>12.7%</b> | 87.3% |
| Melanoma                    | 812  | <b>0.0%</b>  | 100.0% | 811  | <b>37.5%</b> | 62.5%  | 800  | <b>23.2%</b> | 76.8% |
| Mesothelioma                | 99   | <b>0.0%</b>  | 100.0% | 99   | <b>0.0%</b>  | 100.0% | 96   | <b>24.0%</b> | 76.0% |
| NET                         | 463  | <b>2.2%</b>  | 97.8%  | 462  | <b>5.0%</b>  | 95.0%  | 437  | <b>4.8%</b>  | 95.2% |
| NSCLC                       | 4754 | <b>0.7%</b>  | 99.3%  | 4752 | <b>15.9%</b> | 84.1%  | 822  | <b>30.2%</b> | 69.8% |
| Non-melanoma skin           | 143  | <b>2.1%</b>  | 97.9%  | 143  | <b>66.4%</b> | 33.6%  | 141  | <b>34.8%</b> | 65.2% |
| Cancer with unknown primary | 788  | <b>3.0%</b>  | 97.0%  | 779  | <b>11.9%</b> | 88.1%  | 761  | <b>22.6%</b> | 77.4% |
| Other                       | 11   | <b>0.0%</b>  | 100.0% | 11   | <b>0.0%</b>  | 100.0% | 11   | <b>9.1%</b>  | 90.9% |
| Pancreatic                  | 1261 | <b>1.4%</b>  | 98.6%  | 1248 | <b>1.4%</b>  | 98.6%  | 1174 | <b>10.8%</b> | 89.2% |
| Peritoneal                  | 17   | <b>0.0%</b>  | 100.0% | 17   | <b>11.8%</b> | 88.2%  | 17   | <b>23.5%</b> | 76.5% |
| Prostate                    | 463  | <b>3.7%</b>  | 96.3%  | 456  | <b>3.7%</b>  | 96.3%  | 443  | <b>3.4%</b>  | 96.6% |
| Retroperitoneal sarcoma     | 115  | <b>0.0%</b>  | 100.0% | 113  | <b>0.0%</b>  | 100.0% | 107  | <b>11.2%</b> | 88.8% |
| SCLC                        | 220  | <b>0.5%</b>  | 99.5%  | 220  | <b>6.4%</b>  | 93.6%  | 191  | <b>4.7%</b>  | 95.3% |
| Soft tissue sarcoma         | 613  | <b>1.0%</b>  | 99.0%  | 607  | <b>4.1%</b>  | 95.9%  | 573  | <b>13.4%</b> | 86.6% |
| Small intestinal            | 218  | <b>10.1%</b> | 89.9%  | 214  | <b>7.9%</b>  | 92.1%  | 205  | <b>12.2%</b> | 87.8% |
| Thymic                      | 52   | <b>3.8%</b>  | 96.2%  | 52   | <b>1.9%</b>  | 98.1%  | 49   | <b>73.5%</b> | 26.5% |
| Thyroid                     | 108  | <b>1.9%</b>  | 98.1%  | 108  | <b>0.1%</b>  | 99.9%  | 99   | <b>33.3%</b> | 66.7% |
| Uveal melanoma              | 112  | <b>0.9%</b>  | 99.1%  | 111  | <b>2.7%</b>  | 97.3%  | 105  | <b>4.8%</b>  | 95.2% |
| Non-Epithelial Ovarian      | 135  | <b>0.7%</b>  | 99.3%  | 132  | <b>0.8%</b>  | 99.2%  | 127  | <b>3.1%</b>  | 96.9% |

\*Percentage of patients positive for the marker

\*\* PD-L1 positivity as well as MSI-H and TMB-H is associated with sensitivity to checkpoint inhibitors (therefore, for all cancers, 3.3%, 8.4 % and 11.0% of patients, respectively, would be expected to be responsive.

**Abbreviations:** CNS=central nervous system; GIST=gastrointestinal stromal tumor; GBM=glioblastoma multiforme; HCC=hepatocellular carcinoma; MFST=malignant solitary fibrous tumor of the pleura; MSI =microsatellite instability, NET=neuroendocrine tumor; NSCLC=non-small cell lung cancer; PD-L1=programmed death-ligand 1, SCLC=small cell lung cancer; TMB = tumor mutational burden

**Supplemental Table 4: Protein Expression by Cancer Type (bolded percentages are indicative of response to cognate therapy)\***

| Type of Cancer                  | ERCC1** |     |            | MGMT** |      |            | RRM1** |     |             | TOP2A** |             |      | TOPO1** |            |     | TS**  |      |            | TUBB3** |      |            |
|---------------------------------|---------|-----|------------|--------|------|------------|--------|-----|-------------|---------|-------------|------|---------|------------|-----|-------|------|------------|---------|------|------------|
|                                 | N       | +   | -          | N      | +    | -          | N      | +   | -           | N       | +           | -    | N       | +          | -   | N     | +    | -          | N       | +    | -          |
| All                             | 21802   | 21% | <b>79%</b> | 5200   | 55%  | <b>45%</b> | 17205  | 20% | <b>80%</b>  | 12907   | <b>76%</b>  | 24%  | 22211   | <b>59%</b> | 41% | 20491 | 34%  | <b>66%</b> | 19863   | 57%  | <b>43%</b> |
| Adrenal                         | 39      | 41% | <b>59%</b> | 9      | 44%  | <b>56%</b> | 33     | 30% | <b>70%</b>  | 39      | <b>69%</b>  | 31%  | 14      | <b>43%</b> | 57% | 39    | 67%  | <b>33%</b> | 39      | 39%  | <b>62%</b> |
| Anal                            | 97      | 32% | <b>68%</b> | 12     | 58%  | <b>42%</b> | 77     | 47% | <b>53%</b>  | 99      | <b>97%</b>  | 3%   | 32      | <b>56%</b> | 44% | 99    | 64%  | <b>36%</b> | 99      | 38%  | <b>62%</b> |
| Bladder                         | 290     | 20% | <b>80%</b> | 43     | 54%  | <b>47%</b> | 266    | 26% | <b>74%</b>  | 293     | <b>93%</b>  | 7%   | 85      | <b>47%</b> | 53% | 292   | 46%  | <b>54%</b> | 292     | 51%  | <b>49%</b> |
| Bone                            | 76      | 40% | <b>61%</b> | 65     | 75%  | <b>25%</b> | 69     | 20% | <b>80%</b>  | 74      | <b>55%</b>  | 45%  | 71      | <b>58%</b> | 42% | 42    | 48%  | <b>52%</b> | 73      | 47%  | <b>53%</b> |
| Breast                          | 2300    | 28% | <b>72%</b> | 336    | 73%  | <b>27%</b> | 1058   | 29% | <b>71%</b>  | 0       | .           | .    | 1911    | <b>69%</b> | 31% | 1957  | 33%  | <b>67%</b> | 0       | .    | .          |
| CNS tumors                      | 169     | 25% | <b>75%</b> | 27     | 70%  | <b>30%</b> | 111    | 14% | <b>86%</b>  | 167     | <b>37%</b>  | 64%  | 77      | <b>38%</b> | 62% | 167   | 34%  | <b>66%</b> | 168     | 52%  | <b>48%</b> |
| Colorectal cancer               | 3506    | 18% | <b>82%</b> | 1133   | 60%  | <b>41%</b> | 296    | 37% | <b>63%</b>  | 532     | <b>92%</b>  | 9%   | 3502    | <b>59%</b> | 41% | 3664  | 24%  | <b>76%</b> | 529     | 45%  | <b>55%</b> |
| Cholangio-carcinoma             | 392     | 27% | <b>73%</b> | 68     | 65%  | <b>35%</b> | 379    | 8%  | <b>92%</b>  | 84      | <b>64%</b>  | 36%  | 390     | <b>67%</b> | 33% | 400   | 29%  | <b>72%</b> | 397     | 58%  | <b>42%</b> |
| Epithelial Ovarian              | 3664    | 12% | <b>88%</b> | 200    | 79%  | <b>22%</b> | 3683   | 16% | <b>84%</b>  | 3751    | <b>77%</b>  | 23%  | 3629    | <b>52%</b> | 48% | 632   | 51%  | <b>49%</b> | 3751    | 50%  | <b>50%</b> |
| Esophageal                      | 506     | 36% | <b>64%</b> | 46     | 54%  | <b>46%</b> | 30     | 33% | <b>67%</b>  | 513     | <b>96%</b>  | 4%   | 500     | <b>79%</b> | 21% | 513   | 43%  | <b>57%</b> | 513     | 48%  | <b>52%</b> |
| Extrahepatic cholangiocarcinoma | 65      | 17% | <b>83%</b> | 8      | 100% | <b>0%</b>  | 62     | 7%  | <b>94%</b>  | 10      | <b>70%</b>  | 30%  | 60      | <b>52%</b> | 48% | 65    | 25%  | <b>75%</b> | 66      | 49%  | <b>52%</b> |
| Female genital tract malignancy | 2693    | 13% | <b>87%</b> | 156    | 44%  | <b>56%</b> | 2767   | 31% | <b>69%</b>  | 2817    | <b>87%</b>  | 13%  | 2641    | <b>47%</b> | 53% | 2803  | 53%  | <b>47%</b> | 2820    | 57%  | <b>44%</b> |
| GBM                             | 915     | 22% | <b>79%</b> | 44     | 25%  | <b>75%</b> | 90     | 23% | <b>77%</b>  | 139     | <b>63%</b>  | 37%  | 899     | <b>58%</b> | 42% | 405   | 52%  | <b>48%</b> | 400     | 91%  | <b>10%</b> |
| GIST                            | 80      | 48% | <b>53%</b> | 41     | 73%  | <b>27%</b> | 26     | 12% | <b>89%</b>  | 41      | <b>34%</b>  | 66%  | 43      | <b>37%</b> | 63% | 44    | 43%  | <b>57%</b> | 41      | 44%  | <b>56%</b> |
| Gastric                         | 473     | 28% | <b>72%</b> | 74     | 66%  | <b>34%</b> | 54     | 26% | <b>74%</b>  | 480     | <b>81%</b>  | 19%  | 466     | <b>68%</b> | 32% | 482   | 36%  | <b>64%</b> | 483     | 32%  | <b>69%</b> |
| HCC                             | 169     | 24% | <b>76%</b> | 28     | 61%  | <b>39%</b> | 126    | 6%  | <b>94%</b>  | 168     | <b>51%</b>  | 49%  | 66      | <b>49%</b> | 52% | 171   | 26%  | <b>74%</b> | 170     | 13%  | <b>87%</b> |
| Head and Neck                   | 494     | 36% | <b>64%</b> | 62     | 68%  | <b>32%</b> | 468    | 33% | <b>67%</b>  | 200     | <b>68%</b>  | 32%  | 88      | <b>56%</b> | 44% | 503   | 40%  | <b>60%</b> | 504     | 44%  | <b>56%</b> |
| Kidney                          | 335     | 24% | <b>76%</b> | 61     | 54%  | <b>46%</b> | 317    | 4%  | <b>96%</b>  | 347     | <b>37%</b>  | 63%  | 127     | <b>43%</b> | 57% | 134   | 21%  | <b>79%</b> | 345     | 50%  | <b>50%</b> |
| Low Grade Glioma                | 183     | 13% | <b>87%</b> | 6      | 17%  | <b>83%</b> | 9      | 0%  | <b>100%</b> | 18      | <b>0%</b>   | 100% | 181     | <b>37%</b> | 64% | 76    | 5%   | <b>95%</b> | 76      | 76%  | <b>24%</b> |
| MC                              | 12      | 8%  | <b>92%</b> | 2      | 50%  | <b>50%</b> | 6      | 83% | <b>17%</b>  | 12      | <b>100%</b> | 0%   | 10      | <b>80%</b> | 20% | 7     | 71%  | <b>29%</b> | 6       | 100% | <b>0%</b>  |
| MFST                            | 8       | 13% | <b>88%</b> | 8      | 88%  | <b>13%</b> | 7      | 14% | <b>86%</b>  | 8       | <b>50%</b>  | 50%  | 8       | <b>38%</b> | 63% | 2     | 100% | <b>0%</b>  | 8       | 25%  | <b>75%</b> |
| Male Genital Tract              | 53      | 19% | <b>81%</b> | 8      | 50%  | <b>50%</b> | 40     | 35% | <b>65%</b>  | 54      | <b>82%</b>  | 19%  | 20      | <b>55%</b> | 45% | 54    | 44%  | <b>56%</b> | 54      | 52%  | <b>48%</b> |

|                             |      |     |             |     |     |             |      |     |             |     |            |     |      |            |     |      |     |            |      |     |            |
|-----------------------------|------|-----|-------------|-----|-----|-------------|------|-----|-------------|-----|------------|-----|------|------------|-----|------|-----|------------|------|-----|------------|
| Melanoma                    | 794  | 26% | <b>74%</b>  | 798 | 38% | <b>62%</b>  | 31   | 13% | <b>87%</b>  | 84  | <b>71%</b> | 29% | 81   | <b>44%</b> | 56% | 233  | 68% | <b>32%</b> | 803  | 69% | <b>31%</b> |
| Mesothelioma                | 94   | 38% | <b>62%</b>  | 19  | 58% | <b>42%</b>  | 79   | 15% | <b>85%</b>  | 95  | <b>39%</b> | 61% | 34   | <b>65%</b> | 35% | 95   | 34% | <b>66%</b> | 96   | 67% | <b>33%</b> |
| NET                         | 435  | 12% | <b>88%</b>  | 344 | 45% | <b>55%</b>  | 79   | 25% | <b>75%</b>  | 441 | <b>52%</b> | 48% | 158  | <b>53%</b> | 48% | 445  | 27% | <b>74%</b> | 182  | 76% | <b>24%</b> |
| NSCLC                       | 0    | .   | .           | 327 | 64% | <b>36%</b>  | 4074 | 15% | <b>85%</b>  | 368 | <b>79%</b> | 22% | 4102 | <b>66%</b> | 34% | 4233 | 25% | <b>75%</b> | 4236 | 71% | <b>30%</b> |
| Non-melanoma skin           | 139  | 34% | <b>66%</b>  | 14  | 36% | <b>64%</b>  | 105  | 34% | <b>66%</b>  | 141 | <b>85%</b> | 15% | 46   | <b>48%</b> | 52% | 141  | 42% | <b>58%</b> | 141  | 71% | <b>29%</b> |
| Cancer with unknown primary | 751  | 28% | <b>72%</b>  | 85  | 60% | <b>40%</b>  | 726  | 23% | <b>78%</b>  | 256 | <b>78%</b> | 22% | 726  | <b>70%</b> | 30% | 764  | 33% | <b>67%</b> | 759  | 62% | <b>38%</b> |
| Other                       | 11   | 27% | <b>73%</b>  | 4   | 50% | <b>50%</b>  | 8    | 0%  | <b>100%</b> | 11  | <b>36%</b> | 64% | 5    | <b>40%</b> | 60% | 10   | 40% | <b>60%</b> | 11   | 18% | <b>82%</b> |
| Pancreatic                  | 1161 | 26% | <b>75%</b>  | 154 | 81% | <b>19%</b>  | 1142 | 10% | <b>90%</b>  | 184 | <b>65%</b> | 35% | 1141 | <b>58%</b> | 42% | 1189 | 18% | <b>82%</b> | 1180 | 60% | <b>41%</b> |
| Peritoneal                  | 17   | 0%  | <b>100%</b> | 1   | 0%  | <b>100%</b> | 16   | 31% | <b>69%</b>  | 17  | <b>77%</b> | 24% | 14   | <b>36%</b> | 64% | 6    | 67% | <b>33%</b> | 17   | 77% | <b>24%</b> |
| Prostate                    | 442  | 18% | <b>82%</b>  | 34  | 53% | <b>47%</b>  | 25   | 28% | <b>72%</b>  | 150 | <b>47%</b> | 53% | 36   | <b>69%</b> | 31% | 40   | 23% | <b>78%</b> | 446  | 26% | <b>74%</b> |
| Retroperitoneal sarcoma     | 98   | 36% | <b>64%</b>  | 97  | 46% | <b>54%</b>  | 99   | 11% | <b>89%</b>  | 99  | <b>67%</b> | 33% | 95   | <b>45%</b> | 55% | 29   | 41% | <b>59%</b> | 99   | 32% | <b>68%</b> |
| SCLC                        | 201  | 10% | <b>90%</b>  | 171 | 25% | <b>75%</b>  | 20   | 60% | <b>40%</b>  | 206 | <b>97%</b> | 3%  | 62   | <b>69%</b> | 31% | 210  | 50% | <b>51%</b> | 62   | 87% | <b>13%</b> |
| Soft tissue sarcoma         | 574  | 30% | <b>70%</b>  | 558 | 54% | <b>46%</b>  | 553  | 13% | <b>87%</b>  | 586 | <b>64%</b> | 36% | 570  | <b>51%</b> | 49% | 235  | 50% | <b>50%</b> | 584  | 53% | <b>47%</b> |
| Small intestinal            | 200  | 18% | <b>83%</b>  | 35  | 66% | <b>34%</b>  | 88   | 16% | <b>84%</b>  | 125 | <b>80%</b> | 20% | 141  | <b>52%</b> | 48% | 206  | 37% | <b>63%</b> | 128  | 45% | <b>55%</b> |
| Thymic                      | 49   | 16% | <b>84%</b>  | 11  | 82% | <b>18%</b>  | 42   | 21% | <b>79%</b>  | 49  | <b>84%</b> | 16% | 18   | <b>56%</b> | 44% | 49   | 49% | <b>51%</b> | 49   | 20% | <b>80%</b> |
| Thyroid                     | 99   | 23% | <b>77%</b>  | 13  | 62% | <b>39%</b>  | 14   | 14% | <b>86%</b>  | 99  | <b>42%</b> | 58% | 16   | <b>31%</b> | 69% | 18   | 17% | <b>83%</b> | 17   | 88% | <b>12%</b> |
| Uveal melanoma              | 90   | 46% | <b>54%</b>  | 91  | 52% | <b>48%</b>  | 1    | 0%  | <b>100%</b> | 21  | <b>33%</b> | 67% | 21   | <b>48%</b> | 52% | 16   | 38% | <b>63%</b> | 91   | 40% | <b>60%</b> |
| Non-Epithelial Ovarian      | 128  | 14% | <b>86%</b>  | 7   | 43% | <b>57%</b>  | 129  | 21% | <b>79%</b>  | 129 | <b>42%</b> | 58% | 125  | <b>54%</b> | 46% | 21   | 71% | <b>29%</b> | 128  | 32% | <b>68%</b> |

\*Percentage of patients positive for the protein marker

\*\* ERCC1 negativity is associated with platinum response (therefore, for all cancers, 79% of patients would be expected to be responsive) (1,2); MGMT negativity which is associated with response to dacarbazine(3) and temozolomide (4,5) (therefore, for all cancers, 45% of patients would be expected to be responsive); RRM1 negativity is associated with gemcitabine response (therefore, for all cancers, 80% of patients would be expected to be responsive) (6); TOPO2A positivity which is associated with doxorubicin response (therefore, for all cancers, 76% of patients would be expected to be responsive) (7); TOPO1 positivity is associated with irinotecan or topotecan response (therefore, for all cancers, 59% of patients would be expected to be responsive) (8) TS negativity is associated with response to fluorouracil/pemetrexed/capecitabine (therefore, for all cancers, 66% of patients would be expected to be

responsive) (9-12); TUBB3 positivity is associated with taxane resistance (therefore, for all cancers, 43% of patients would be expected to be responsive) (13-15)

**Abbreviations:** CNS=central nervous system; ERCC1=excision repair complementation group 1, GIST=gastrointestinal stromal tumor; GBM=glioblastoma multiforme; HCC = hepatocellular carcinoma; MFST=malignant solitary fibrous tumor of the pleura; MGMT= O-6-methyl guanine DNA methyltransferase, NET=neuroendocrine tumor; NSCLC=non-small cell lung cancer; RRM1=ribonucleotide reductase regulatory subunit M1; SCLC = small cell lung cancer; TOP2A=topoisomerase 2; TOPO1=topoisomerase 1; TS=thymidylate synthetase; TUBB3=tubulin beta 3



**Supplemental Table 5: Relationship between MSI-H and protein markers\***

| Tumor type                      | Odds Ratio (95% CI)   | p-value | N     | Comment                                                                                                                                                                                                                                               |
|---------------------------------|-----------------------|---------|-------|-------------------------------------------------------------------------------------------------------------------------------------------------------------------------------------------------------------------------------------------------------|
| <b>MSI-H and TS</b>             |                       |         |       |                                                                                                                                                                                                                                                       |
| Colorectal cancer               | 13.86 (10.05 – 19.13) | <0.001  | 3,665 | No for benefit of combination of immunotherapy and fluorouracil/pemetrexed/capecitabine (TS negativity is associated with response to fluorouracil/pemetrexed/capecitabine (9-12). However, data shows that TS positivity was correlated with TMB-H.) |
| Cholangiocarcinoma              | 6.51 (1.25 – 34.07)   | 0.022   | 400   |                                                                                                                                                                                                                                                       |
| Epithelial ovarian Cancer       | Infinity (>1.50)**    | 0.031   | 632   |                                                                                                                                                                                                                                                       |
| Female Genital Tract Malignancy | 1.74 (1.40 – 2.17)    | <0.001  | 2,803 |                                                                                                                                                                                                                                                       |
| Gastric cancer                  | 3.92 (1.91-8.06)      | <0.001  | 483   |                                                                                                                                                                                                                                                       |
| Neuroendocrine tumor            | 4.33 (1.20-15.61)     | 0.025   | 445   |                                                                                                                                                                                                                                                       |
| Cancer with unknown primary     | 10.36 (3.48-30.78)    | <0.001  | 764   |                                                                                                                                                                                                                                                       |
| Pancreatic cancer               | 6.26 (2.30-16.99)     | 0.001   | 1,189 |                                                                                                                                                                                                                                                       |
| Small intestine cancer          | 4.56 (1.67-12.43)     | 0.0027  | 206   |                                                                                                                                                                                                                                                       |
| <b>MSI-H and TOP2A</b>          |                       |         |       |                                                                                                                                                                                                                                                       |
| Epithelial ovarian              | 6.46 (1.56 – 26.73)   | 0.002   | 3,751 | Yes for benefit of combination of immunotherapy and doxorubicin (TOPO1 positivity, which is associated with doxorubicin response (7), was correlated with MSI-H.)                                                                                     |
| Female Genital Tract Malignancy | 1.82 (1.25 -2.64)     | 0.001   | 2,817 |                                                                                                                                                                                                                                                       |
| Gastric                         | 4.20 (0.99 – 17.83)   | 0.043   | 480   |                                                                                                                                                                                                                                                       |
| Neuroendocrine tumor            | Infinity (>2.40)**    | 0.004   | 441   |                                                                                                                                                                                                                                                       |

\*Fisher's exact tests were performed for TS and TOP2A since tumor types could not be combined (only significant results are presented in table); if odds ratio of biomarker is less than 1 and p-value is significant, then biomarker negativity is associated with MSI-H

\*\*Due to a zero cell, estimated odds ratio is infinite and the 95% confidence interval is one-sided

**Abbreviations:** CI=confidence interval, MSI=microsatellite instability, TS=thymidylate synthetase; TOP2A=topoisomerase 2

**Supplemental Table 6: Relationship between TMB-H and protein markers\***

|                                          | <b>Odds Ratio<br/>(95% CI)</b> | <b>p-value</b> | <b>N</b> | <b>Comment</b>                                                                                                                                                                                                                                               |
|------------------------------------------|--------------------------------|----------------|----------|--------------------------------------------------------------------------------------------------------------------------------------------------------------------------------------------------------------------------------------------------------------|
| <b>TMB-H and RRM1 protein expression</b> |                                |                |          |                                                                                                                                                                                                                                                              |
| Small intestinal cancer                  | 14.40 (2.33-89.03)             | 0.005          | 88       | No for benefit of combination of immunotherapy and gemcitabine.<br><br>(RRM1 negativity is associated with gemcitabine response (6). However, data shows that RRM1 positivity was correlated with TMB-H.)                                                    |
| Pancreatic cancer                        | 5.25 (1.90-14.49)              | 0.004          | 1,133    |                                                                                                                                                                                                                                                              |
| Cancer with unknown primary              | 1.93 (1.19-3.12)               | 0.010          | 717      |                                                                                                                                                                                                                                                              |
| Non-small cell lung cancer               | 1.34 (1.07-1.67)               | 0.012          | 4,072    |                                                                                                                                                                                                                                                              |
| Female genital tract malignancy          | 3.50 (2.76-4.44)               | <0.001         | 2,755    |                                                                                                                                                                                                                                                              |
| Epithelial ovarian cancer                | 3.77 (2.28-6.22)               | <0.001         | 3,664    |                                                                                                                                                                                                                                                              |
| Breast cancer                            | 2.14 (1.03-4.45)               | 0.043          | 1,055    |                                                                                                                                                                                                                                                              |
| Bladder cancer                           | 2.26 (1.18-4.32)               | 0.019          | 265      |                                                                                                                                                                                                                                                              |
| Non-melanoma skin cancer                 | 0.38 (0.16-0.88)               | 0.031          | 105      | Yes for benefit of combination of immunotherapy and gemcitabine.<br><br>(RRM1 negativity is associated with gemcitabine response (6) and data shows that RRM1 negativity was correlated with TMB-H.)                                                         |
| <b>TMB-H and TS protein expression</b>   |                                |                |          |                                                                                                                                                                                                                                                              |
| Small Intestinal Cancer                  | 6.30 (1.97-20.10)              | 0.001          | 205      | No for benefit of combination of immunotherapy and fluorouracil/pemetrexed/capecitabine<br><br>(TS negativity is associated with response to fluorouracil/pemetrexed/capecitabine (9-12). However, data shows that TS positivity was correlated with TMB-H.) |
| Pancreatic cancer                        | 4.81 (1.89-12.27)              | 0.002          | 1,180    |                                                                                                                                                                                                                                                              |
| Cancer with unknown primary              | 2.08 (1.34-3.24)               | 0.001          | 755      |                                                                                                                                                                                                                                                              |
| Non-small cell lung cancer               | 1.63 (1.36-1.94)               | <0.001         | 4,231    |                                                                                                                                                                                                                                                              |
| Gastric cancer                           | 4.47 (2.14-9.33)               | <0.001         | 481      |                                                                                                                                                                                                                                                              |
| Female Genital Tract Malignancy          | 1.68 (1.32-2.13)               | <0.001         | 2,791    |                                                                                                                                                                                                                                                              |

|                                           |                    |        |       |                                                                                                                                                                                                                                                      |
|-------------------------------------------|--------------------|--------|-------|------------------------------------------------------------------------------------------------------------------------------------------------------------------------------------------------------------------------------------------------------|
| Epithelial ovarian cancer                 | Inf (>1.50)**      | 0.031  | 633   |                                                                                                                                                                                                                                                      |
| Cholangiocarcinoma                        | 3.53 (1.20-10.42)  | 0.029  | 397   |                                                                                                                                                                                                                                                      |
| Colorectal cancer                         | 10.57 (7.96-14.04) | <0.001 | 3,652 |                                                                                                                                                                                                                                                      |
| Breast cancer                             | 0.53 (0.30-0.95)   | 0.029  | 1,940 | Yes for benefit of combination of immunotherapy and fluorouracil/pemetrexed/capecitabine<br><br>(TS negativity is associated with response to fluorouracil/pemetrexed/capecitabine (9-12). Data shows that TS negativity was correlated with TMB-H.) |
| Merkel cell                               | 0 (<0.97)**        | 0.048  | 7     |                                                                                                                                                                                                                                                      |
| <b>TMB-H and TUBB3 protein expression</b> |                    |        |       |                                                                                                                                                                                                                                                      |
| Non-small cell lung cancer                | 1.22 (1.01-1.47)   | 0.035  | 4,234 | No for benefit of combination of immunotherapy and taxanes                                                                                                                                                                                           |
| Melanoma                                  | 1.80 (1.30-2.48)   | <0.001 | 802   | (TUBB3 positivity is associated with taxane resistance (13-15). Data shows that TUBB3 positivity was correlated with TMB-H.)                                                                                                                         |
| Female genital tract malignancy           | 0.78 (0.62-0.98)   | 0.039  | 2,808 | Yes for benefit of combination of immunotherapy and taxanes                                                                                                                                                                                          |
| Colorectal cancer                         | 0.43 (0.20-0.95)   | 0.046  | 529   | (TUBB3 positivity is associated with taxane resistance (13-15). Data shows that TUBB3 negativity was correlated with TMB-H.)                                                                                                                         |

\*Fisher's exact tests were performed for RRM1, TS, and TUBB3 since tumor types could not be combined (only significant results are presented in table); if odds ratio of biomarker is greater than 1 and p-value is significant, then biomarker positivity is associated with TMB-H; if odds ratio of biomarker is less than 1 and p-value is significant, then biomarker negativity is associated with TMB-H

\*\*Due to a zero cell, estimated odds ratio is zero and the 95% confidence interval is one-sided

**Abbreviations:** CI=confidence interval, RRM1=ribonucleotide reductase regulatory subunit M1, TMB=tumor mutational burden, TS=thymidylate synthetase; TUBB3=tubulin beta 3

**Supplemental Table 7: Relationship between PD-L1 positivity and protein markers\***

|                                                    | <b>Odds Ratio<br/>(95% CI)</b> | <b>p-value</b> | <b>N</b> | <b>Comment</b>                                                                                                                                                                                          |
|----------------------------------------------------|--------------------------------|----------------|----------|---------------------------------------------------------------------------------------------------------------------------------------------------------------------------------------------------------|
| <b>PD-L1 positive and ERCC1 protein expression</b> |                                |                |          |                                                                                                                                                                                                         |
| Glioblastoma multiforme                            | 1.61 (1.06 - 2.42)             | 0.030          | 900      | No for benefit of combination of immunotherapy and platinum<br><br>(ERCC1 negativity, which is associated with platinum response (1,2), however ERCC1 positivity was correlated with PD-L1 positivity.) |
| Female genital tract malignancy                    | 1.81 (1.31-2.49)               | <0.001         | 2,642    |                                                                                                                                                                                                         |
| Esophageal cancer                                  | 2.07 (1.21-3.55)               | 0.010          | 486      |                                                                                                                                                                                                         |
| Gastrointestinal stromal tumor                     | 0.12 (0.014 - 0.99)            | 0.032          | 77       | Yes for benefit of combination of immunotherapy and platinum<br><br>(ERCC1 negativity, which is associated with platinum response (1,2), was correlated with PD-L1 positivity.)                         |
| <b>PD-L1 positive and RRM1 protein expression</b>  |                                |                |          |                                                                                                                                                                                                         |
| Non-epithelial ovarian cancer                      | 13.64 (1.35-137.35)            | 0.025          | 126      | No benefit of combination of immunotherapy and gemcitabine.<br><br>(RRM1 negativity is associated with gemcitabine response (6); however data shows that RRM1 positivity was correlated with TMB-H.)    |
| Soft tissue sarcoma                                | 2.34 (1.28-4.26)               | 0.010          | 537      |                                                                                                                                                                                                         |
| Pancreatic cancer                                  | 1.84 (1.06 - 3.17)             | 0.032          | 1,114    |                                                                                                                                                                                                         |
| Female genital tract malignancy                    | 1.38 (1.07 -1.79)              | 0.016          | 2,710    |                                                                                                                                                                                                         |
| Cholangiocarcinoma                                 | 5.06 (2.03 - 12.63)            | 0.002          | 372      |                                                                                                                                                                                                         |
| <b>PD-L1 positive and TOP2A protein expression</b> |                                |                |          |                                                                                                                                                                                                         |
| Non-epithelial ovarian cancer                      | Inf (>1.28)**                  | 0.029          | 126      | Yes for benefit of combination of immunotherapy and doxorubicin                                                                                                                                         |
| Soft tissue sarcoma                                | 3.19 (1.71-5.96)               | <0.001         | 570      |                                                                                                                                                                                                         |

|                                                 |                     |        |       |                                                                                                                                                                                                                                                       |
|-------------------------------------------------|---------------------|--------|-------|-------------------------------------------------------------------------------------------------------------------------------------------------------------------------------------------------------------------------------------------------------|
| Cancer with unknown primary                     | 17.76 (2.39-131.77) | <0.001 | 253   | (TOPO2A positivity, which is associated with doxorubicin, epirubicin, and etoposide response (7,16), was correlated with PD-L1 positivity.)                                                                                                           |
| Non-melanoma skin                               | 3.78 (1.05-13.55)   | 0.045  | 140   |                                                                                                                                                                                                                                                       |
| Non-small cell lung cancer                      | 8.55 (1.99-36.73)   | <0.001 | 214   |                                                                                                                                                                                                                                                       |
| Neuroendocrine tumor                            | 5.53 (1.60 -19.16)  | 0.003  | 427   |                                                                                                                                                                                                                                                       |
| Mesothelioma                                    | 3.65 (1.34-9.94)    | 0.013  | 93    |                                                                                                                                                                                                                                                       |
| Kidney cancer                                   | 3.94 (2.26-6.87)    | <0.001 | 341   |                                                                                                                                                                                                                                                       |
| Head and Neck                                   | 3.61 (1.33 - 9.80)  | 0.010  | 191   |                                                                                                                                                                                                                                                       |
| Female genital tract malignancy                 | 2.65 (1.58 - 4.45)  | <0.001 | 2,760 |                                                                                                                                                                                                                                                       |
| <b>PD-L1 positive and TS protein expression</b> |                     |        |       |                                                                                                                                                                                                                                                       |
| Small intestinal cancer                         | 3.47 (1.45-8.30)    | 0.007  | 205   | No for benefit of combination of immunotherapy and fluorouracil/pemetrexed/capecitabine (TS negativity is associated with response to fluorouracil/pemetrexed/capecitabine (9-12). However, data shows that TS positivity was correlated with TMB-H.) |
| Pancreatic cancer                               | 2.40 (1.58-3.62)    | <0.001 | 1,163 |                                                                                                                                                                                                                                                       |
| Cancer with unknown primary                     | 2.08 (1.46-2.97)    | <0.001 | 743   |                                                                                                                                                                                                                                                       |
| Non-small cell lung cancer                      | 1.43 (1.03-2.00)    | 0.036  | 769   |                                                                                                                                                                                                                                                       |
| Neuroendocrine tumor                            | 2.90 (1.17-7.15)    | 0.035  | 429   |                                                                                                                                                                                                                                                       |
| Melanoma                                        | 3.37 (1.35-8.43)    | 0.006  | 224   |                                                                                                                                                                                                                                                       |
| Kidney cancer                                   | 3.79 (1.39 - 10.32) | 0.015  | 130   |                                                                                                                                                                                                                                                       |
| Head and neck                                   | 2.46 (1.68 - 3.61)  | <0.001 | 478   |                                                                                                                                                                                                                                                       |
| Gastric cancer                                  | 4.48 (2.34-8.55)    | <0.001 | 456   |                                                                                                                                                                                                                                                       |
| Female genital tract malignancy                 | 1.32 (1.03-1.70)    | 0.031  | 2,747 |                                                                                                                                                                                                                                                       |
| Epithelial ovarian cancer                       | 2.44 (1.25-4.77)    | 0.008  | 617   |                                                                                                                                                                                                                                                       |
| Cholangiocarcinoma                              | 2.81 (1.40-5.62)    | 0.006  | 394   |                                                                                                                                                                                                                                                       |
| Colorectal cancer                               | 3.50 (2.44-5.03)    | <0.001 | 3,566 |                                                                                                                                                                                                                                                       |
| Breast cancer                                   | 2.09 (1.44-3.04)    | <0.001 | 1,933 |                                                                                                                                                                                                                                                       |

|                                                    |                  |        |     |                                                                                                                                                                                                         |
|----------------------------------------------------|------------------|--------|-----|---------------------------------------------------------------------------------------------------------------------------------------------------------------------------------------------------------|
| Bladder cancer                                     | 2.65 (1.53-4.59) | <0.001 | 290 |                                                                                                                                                                                                         |
| <b>PD-L1 positive and TUBB3 protein expression</b> |                  |        |     |                                                                                                                                                                                                         |
| Soft tissue sarcoma                                | 1.79 (1.08-2.94) | 0.027  | 568 | No for benefit of combination of immunotherapy and taxanes<br><br>(TUBB3 positivity is associated with taxane resistance (13-15). However, data shows that TUBB3 positivity was correlated with TMB-H.) |
| Cancer with unknown primary                        | 1.55 (1.07-2.24) | 0.019  | 738 |                                                                                                                                                                                                         |
| Non-small cell lung cancer                         | 1.97 (1.36-2.84) | <0.001 | 763 |                                                                                                                                                                                                         |
| Kidney cancer                                      | 2.20 (1.26-3.84) | 0.006  | 340 |                                                                                                                                                                                                         |
| Head and neck                                      | 1.52 (1.04-2.21) | 0.035  | 479 |                                                                                                                                                                                                         |
| Gastric cancer                                     | 2.86 (1.55-5.27) | 0.001  | 457 |                                                                                                                                                                                                         |
| Esophageal cancer                                  | 2.23 (1.28-3.89) | 0.004  | 490 |                                                                                                                                                                                                         |
| Bladder cancer                                     | 2.50 (1.43-4.36) | 0.001  | 291 |                                                                                                                                                                                                         |

\*Fisher's exact tests were performed for RRM1, TS, and TUBB3 since tumor types could not be combined (only significant results are presented in table); if odds ratio of biomarker is greater than 1 and p-value is significant, then biomarker positivity is associated with TMB-H; if odds ratio of biomarker is less than 1 and p-value is significant, then biomarker negativity is associated with TMB-H

\*\*Due to a zero cell, estimated odds ratio is infinite and the 95% confidence interval is one-sided

**Abbreviations:** CI=confidence interval, ERCC1= excision repair complementation group 1, RRM1=ribonucleotide reductase regulatory subunit M1, TMB=tumor mutational burden, TS=thymidylate synthetase; TUBB3=tubulin beta 3
